# Supplementary material
Source: publisher figshare collection journal article supplement (https://frontiersin.figshare.com/ndownloader/files/13149233)

Supplementary Figure 1

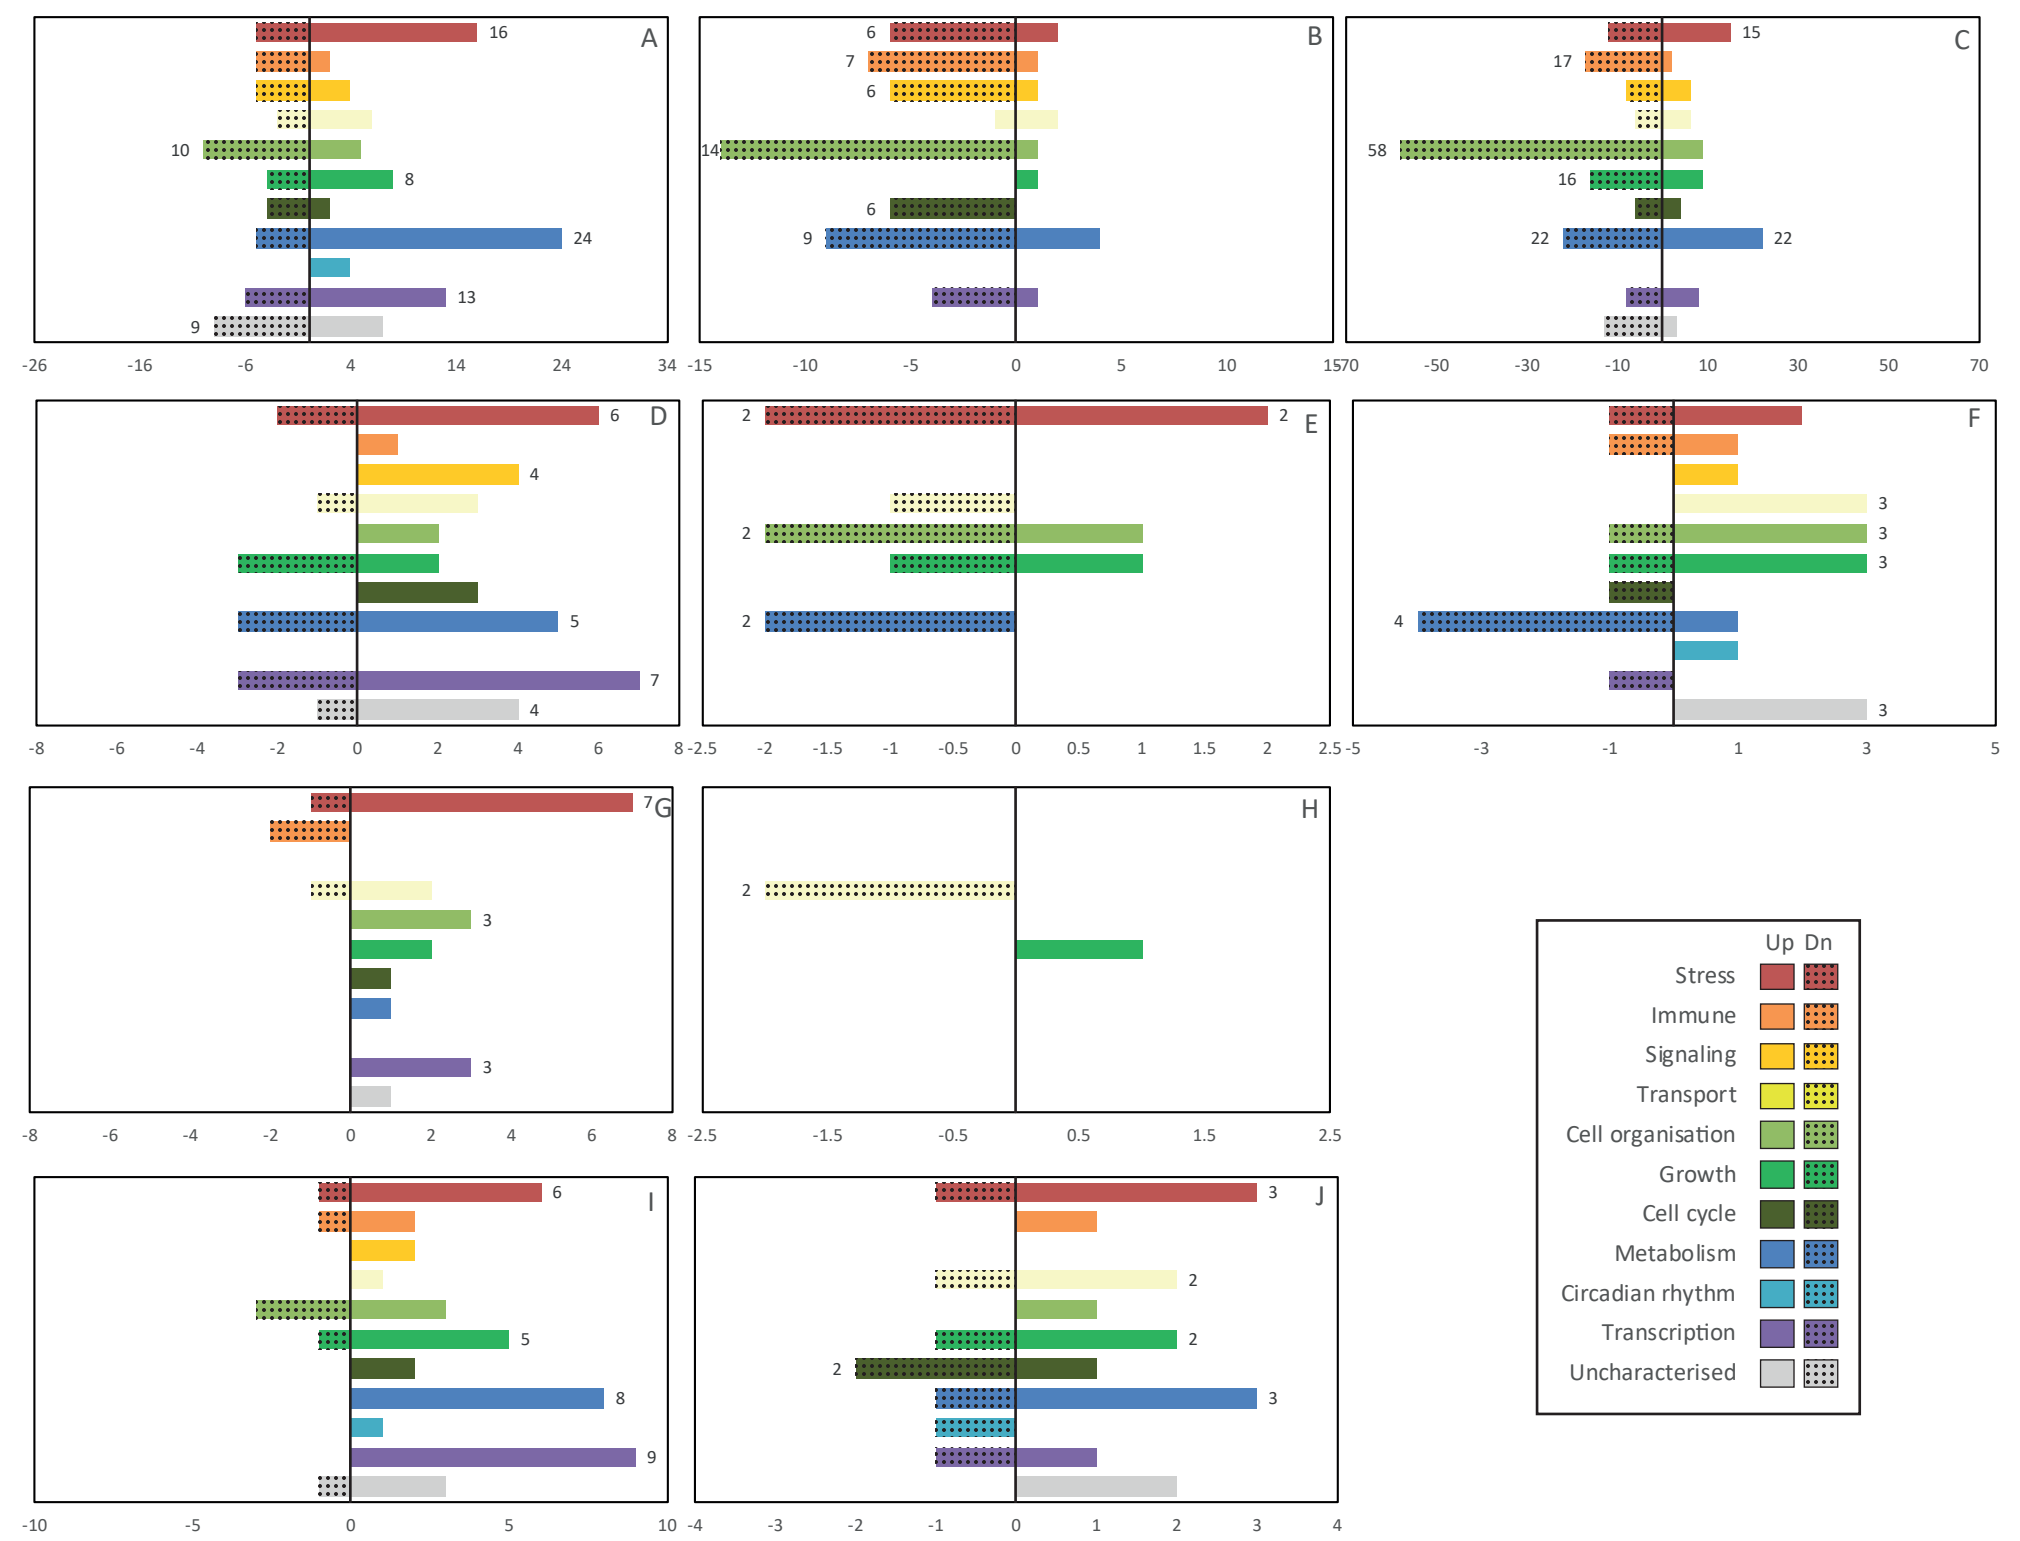

Supplement: Supplementary file 1 [file 13149233]
